# Supplementary material for: Synergistic photothermal antimicrobial therapy using graphene oxide/polymer composite layer-by-layer thin films
Source: Royal Society of Chemistry journal article supplement (doi:10.1039/c5ra23038a), 2016-01-01
Supplement: c5ra23038a1.pdf [file c5ra23038a1.pdf]

## Electronic Supporting Information

### **Synergistic Photothermal Antimicrobial Therapy using Graphene Oxide/Polymer Composite Layer-by-Layer Thin Films**

Rajendra Kurapati,<sup>a</sup> Mahalakshmi Vaidyanathan,<sup>a</sup> and Ashok M Raichur<sup>a, b\*</sup>

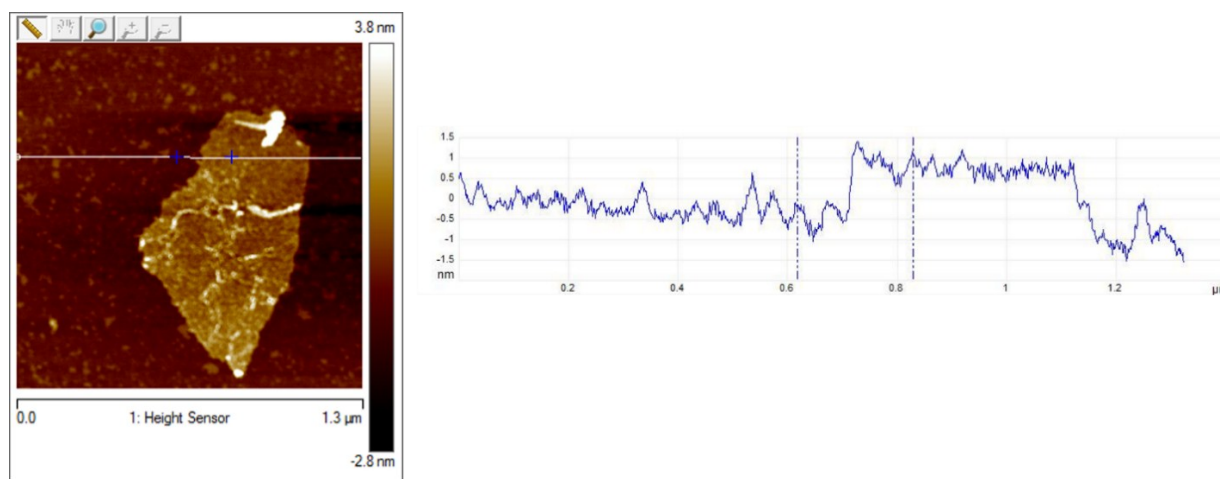

**Figure S1.** AFM image of exfoliated graphene oxide along with line profile thickness measurement.

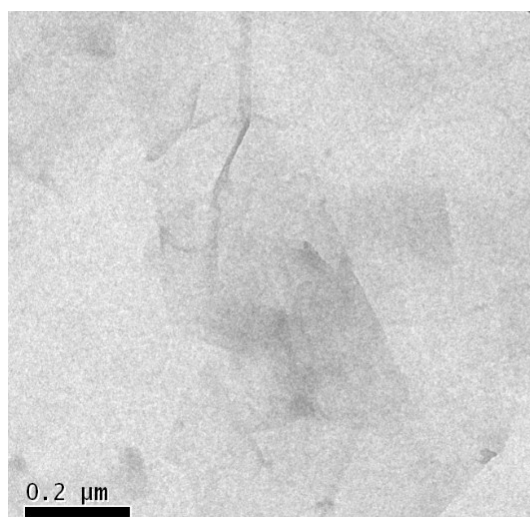

**Figure S2.** TEM images of exfoliated graphene oxide sheets.

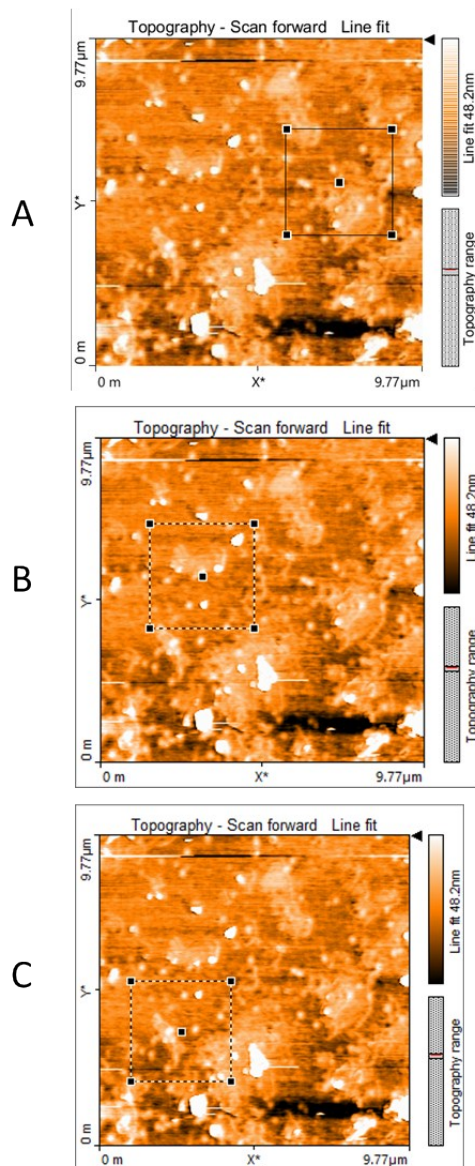

-- Area Roughness --

|      |                         |
|------|-------------------------|
| Area | = 10.51 $\mu\text{m}^2$ |
| Sa   | = 5.6064nm              |
| Sq   | = 6.7569nm              |
| Sy   | = 51.591nm              |
| Sp   | = 26.16nm               |
| Sv   | = -25.432nm             |
| Sm   | = -821.13 $\mu\text{m}$ |

Parameter:

-- Area Roughness --

|      |                         |
|------|-------------------------|
| Area | = 10.51 $\mu\text{m}^2$ |
| Sa   | = 4.6579nm              |
| Sq   | = 8.1158nm              |
| Sy   | = 92.262nm              |
| Sp   | = 74.695nm              |
| Sv   | = -17.567nm             |
| Sm   | = 132.09 $\mu\text{m}$  |

-- Area Roughness --

|      |                         |
|------|-------------------------|
| Area | = 10.51 $\mu\text{m}^2$ |
| Sa   | = 5.4244nm              |
| Sq   | = 7.2325nm              |
| Sy   | = 71.575nm              |
| Sp   | = 47.397nm              |
| Sv   | = -24.178nm             |
| Sm   | = -512.94 $\mu\text{m}$ |

**Figure S3: Surface roughness:** (A-C) AFM images of the GO/PAH films (20 layers), and the surface roughness values were shown in the left side, root mean square (RMS) value ( $S_q$ ) was compared for all three films. for the area of  $\sim 3.19 \times 3.19 \mu\text{m}$ . Average surface roughness is ( $S_q$ ) 7.36 nm.

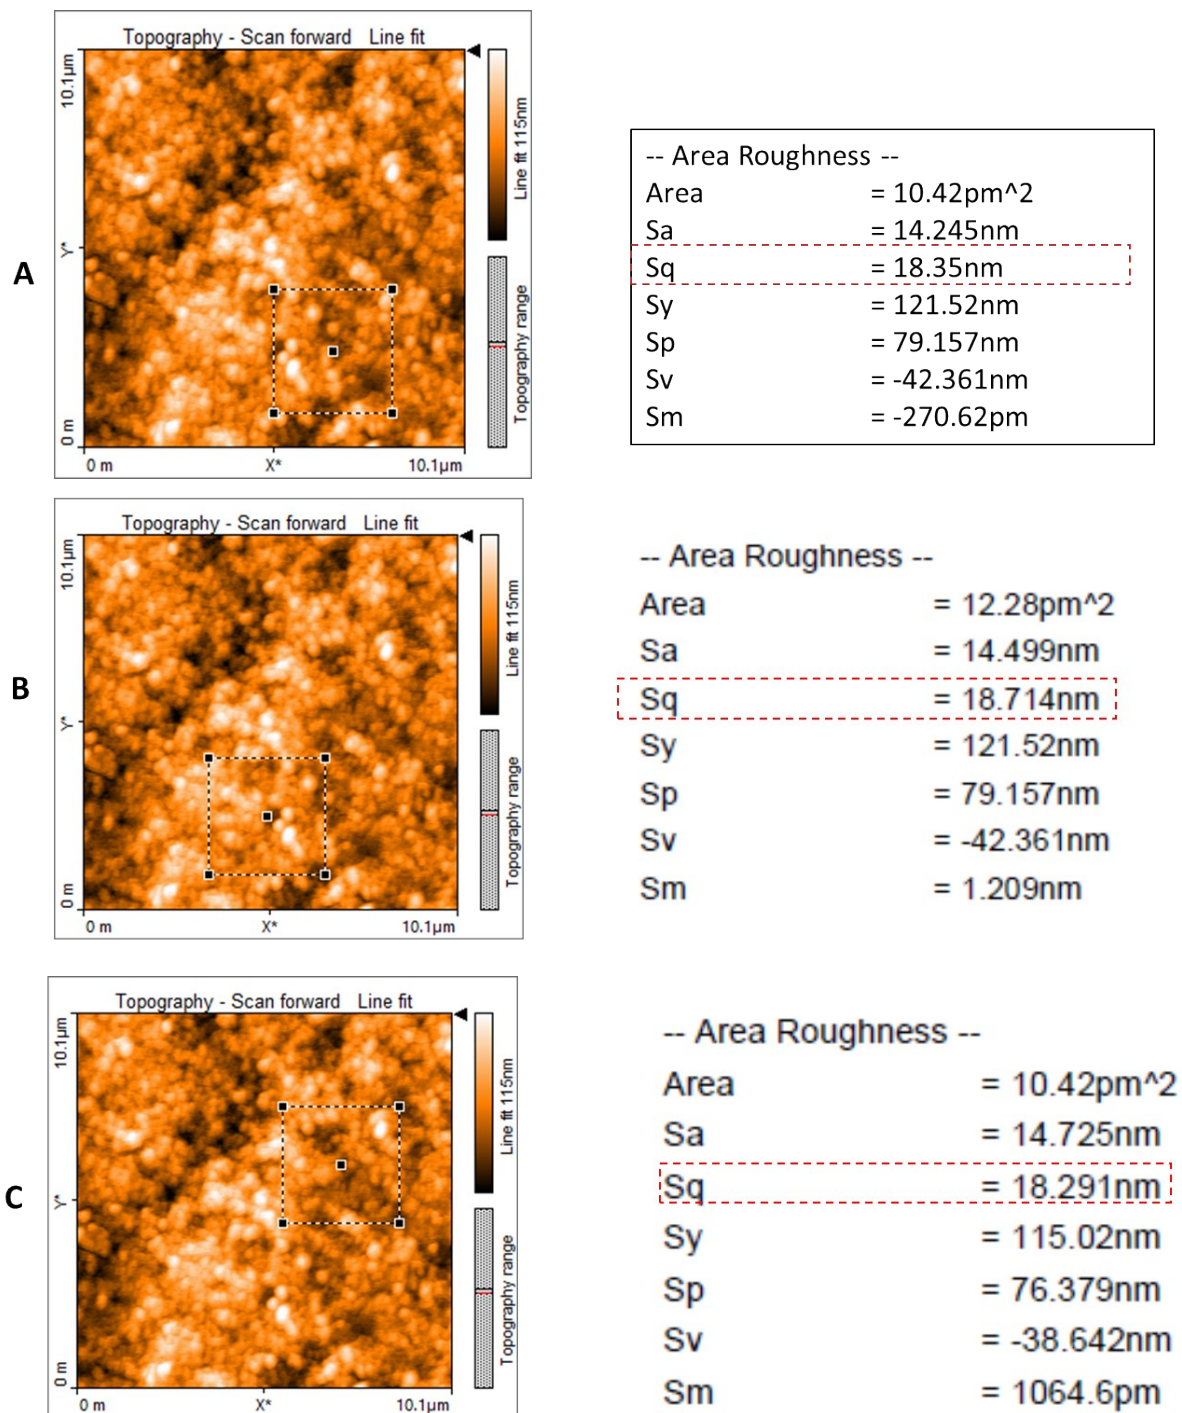

**Figure S4: Surface roughness:** (A-C) AFM images of the GO/PAH films (40 layers), and the surface roughness values were shown in the left side, root mean square (RMS) value ( $S_q$ ) was compared for all three films. for the area of  $\sim 3.19 \times 3.19 \mu\text{m}$ . Average surface roughness is ( $S_q$ ) 18.45 nm.



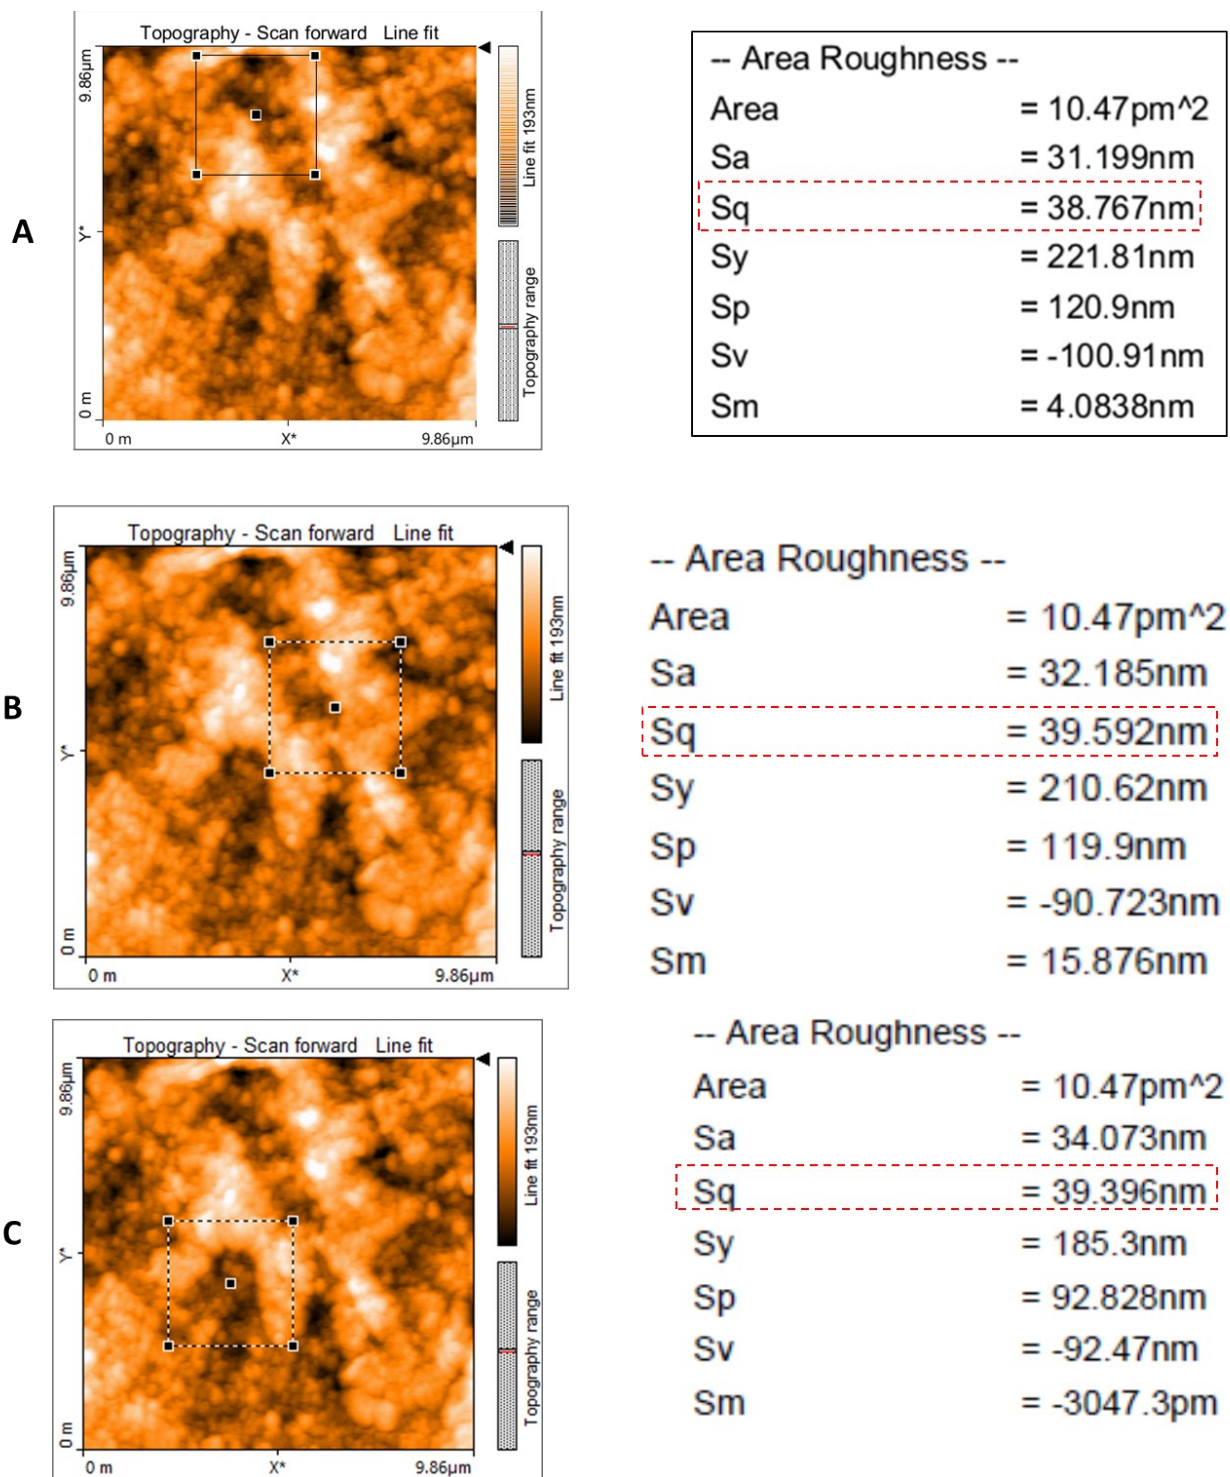

**Figure S5: Surface roughness:** (A-C) AFM images of the GO/PAH films (80 layers), and the surface roughness values were shown in the left side, root mean square (RMS) value ( $S_q$ ) was compared for all three films. for the area of  $\sim 3.19 \times 3.19 \mu\text{m}$ . Average surface roughness is ( $S_q$ ) 39.24 nm.

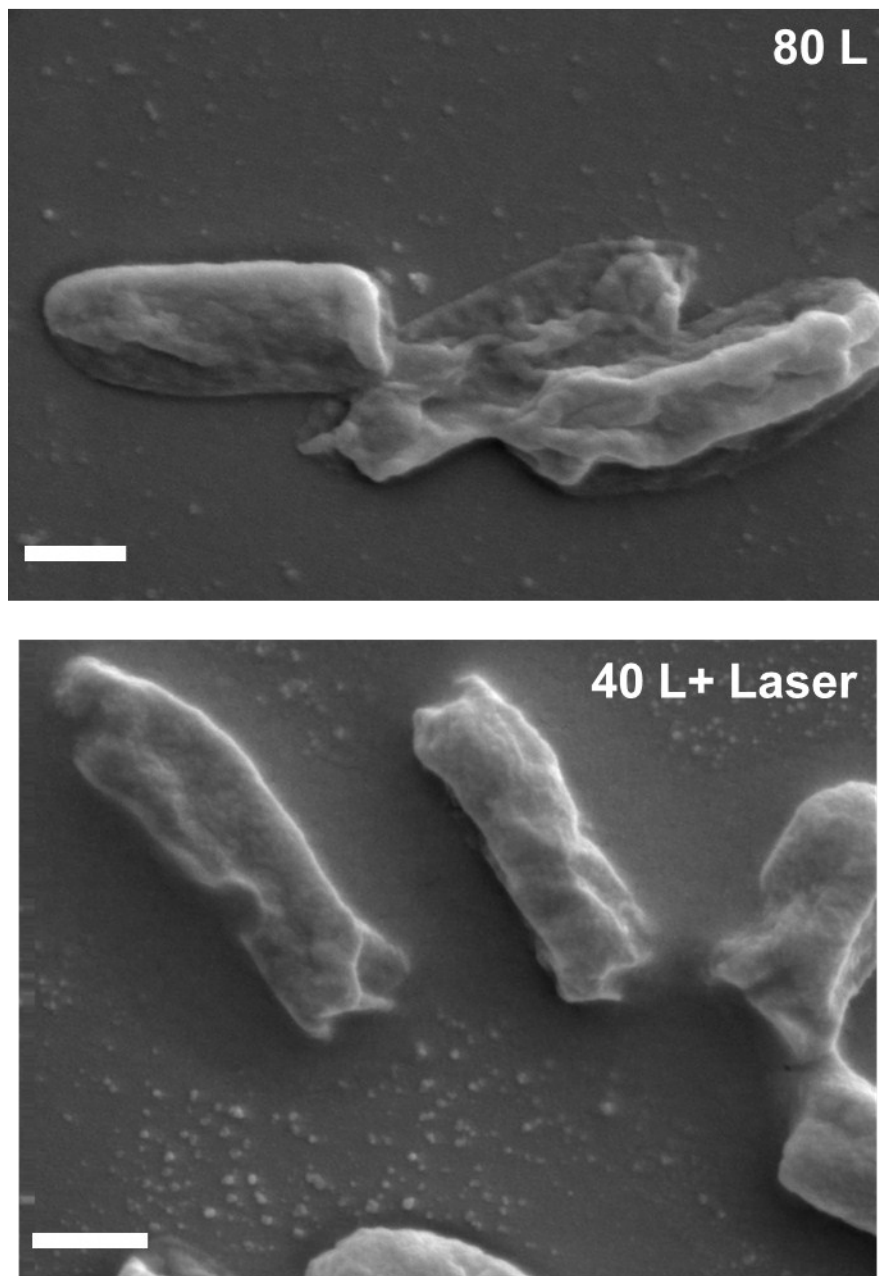

**Figure S6:** SEM images of 40 layers treated cells (top) and 80 layers + laser treated cells (below) respectively, where scale bar represents 500 nm.
